# Supplementary material for: The Architect Who Lost the Ability to Imagine: The Cerebral Basis of Visual Imagery
Source: MDPI journal article supplement (doi:10.3390/brainsci10020059), 2020-01-21
Supplement: s1 [file s1]

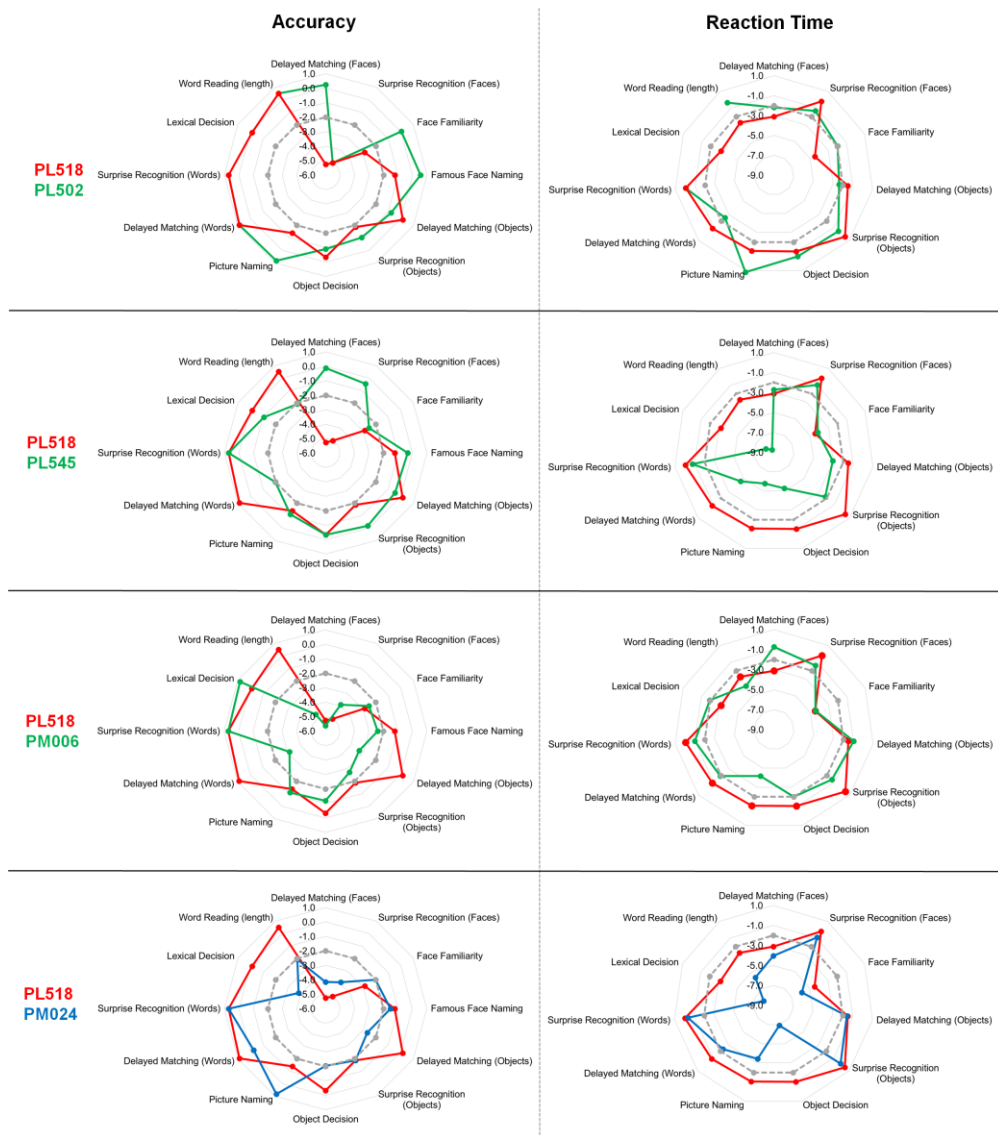

**Figure S1.** Radar plots comparing individual bilateral patients' neuropsychological profile to PL518.

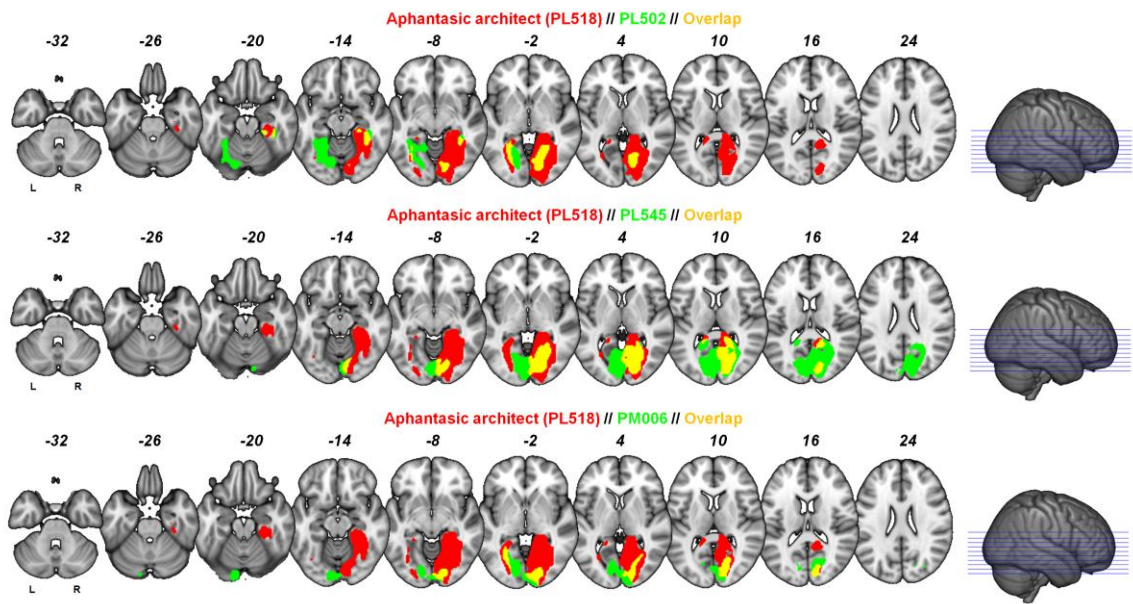

**Figure S2.** Individual comparison of bilateral patients' structural MRI with PL518.
